# Supplementary material
Source: MDPI journal article supplement (https://www.mdpi.com/2673-8112/3/4/32)

# SARS-COV-2 CONTACTS SYMPTOM DEVELOPMENT AND SECONDARY ATTACK RATE: A RETROSPECTIVE ANALYSIS OF A CONTACT-TRACING COHORT IN CATALONIA

## Supplementary Material

**Table S1. Symptom development and confirmation of COVID-19 case among close contacts (CC).**

| Secondary case | Symptomatic CC |               |               |               | Total         |
|----------------|----------------|---------------|---------------|---------------|---------------|
|                | Yes            |               | No            |               |               |
|                | n              | %             | n             | %             |               |
| Yes            | 6,326          | 68.4%         | 5,357         | 13.9%         | 11,683        |
| No             | 2,918          | 31.6%         | 33,128        | 86.1%         | 36,046        |
| <b>TOTAL</b>   | <b>9,244</b>   | <b>100.0%</b> | <b>38,485</b> | <b>100.0%</b> | <b>47,729</b> |

**Table S2. Demographic factors of symptom development among secondary cases reported at the time of case epidemiological interview before and after the Universal PCR strategy**

|                             | Before      |              | After       |              | p-value         |
|-----------------------------|-------------|--------------|-------------|--------------|-----------------|
|                             | n           | %            | n           | %            |                 |
| <b>TOTAL</b>                | <b>2812</b> | <b>56,3%</b> | <b>3514</b> | <b>52,6%</b> | <b>&lt;0,05</b> |
| <b>Sex</b>                  |             |              |             |              |                 |
| Males                       | 1256        | 54,7%        | 1597        | 50,2%        | <0.05           |
| Females                     | 1556        | 57,6%        | 1917        | 54,7%        |                 |
| <b>Age group (years)</b>    |             |              |             |              |                 |
| 0-1                         | 52          | 59,8%        | 55          | 52,4%        | <0.05           |
| 2-5                         | 115         | 44,9%        | 119         | 36,4%        |                 |
| 6-12                        | 192         | 43,6%        | 213         | 33,3%        |                 |
| 13-19                       | 220         | 47,8%        | 278         | 40,9%        |                 |
| 20-39                       | 988         | 58,0%        | 1248        | 57,4%        |                 |
| 40-59                       | 855         | 61,2%        | 1098        | 58,7%        |                 |
| 60-79                       | 326         | 59,9%        | 423         | 57,2%        |                 |
| > 79                        | 64          | 57,1%        | 80          | 53,7%        |                 |
| <b>Setting of exposure*</b> |             |              |             |              |                 |
| Social                      | 2           | 50,0%        | 440         | 53,7%        | <0.05           |

|                            |     |       |      |       |
|----------------------------|-----|-------|------|-------|
| Household                  | 16  | 44,4% | 1876 | 49,9% |
| Non-household / Non-social | 19  | 67,9% | 300  | 57,1% |
| Unknown                    | 689 | 54,7% | 898  | 56,8% |

\* Setting of exposure only for close contacts registered in August.

Mantel-Haenszel chi-squared test

**Table S3.** Typology of COVID-19 like symptoms among symptomatic secondary cases (SC).

| Type of symptoms | Number of SC | %             |
|------------------|--------------|---------------|
| Ageusia          | 975          | 30.6%         |
| Anosmia          | 1,062        | 33.3%         |
| Chill            | 507          | 15.9%         |
| Cough            | 1,441        | 45.2%         |
| Diarrhea         | 775          | 24.3%         |
| Dyspnea          | 353          | 11.1%         |
| Fever            | 1,716        | 53.8%         |
| Odynophagia      | 987          | 30.9%         |
| Vomit            | 213          | 6.7%          |
| <b>TOTAL</b>     | <b>3,190</b> | <b>100.0%</b> |

**Table S3a).** Typology of COVID-19 like symptoms among symptomatic secondary cases by sex

|              | Women        |               | Men          |               | p-value |
|--------------|--------------|---------------|--------------|---------------|---------|
|              | n            | %             | n            | %             |         |
| Fever        | 453          | 25.8%         | 421          | 29.4%         | 0.05    |
| Cough        | 421          | 23.9%         | 356          | 24.9%         | 0.66    |
| Odynophagia  | 341          | 19.4%         | 247          | 17.2%         | <0.05   |
| Chill        | 187          | 10.6%         | 173          | 12.1%         | 0.869   |
| Dyspnea      | 128          | 7.3%          | 83           | 5.8%          | 0.074   |
| Vomit        | 75           | 4.3%          | 35           | 2.4%          | <0.05   |
| Diarrhea     | 252          | 14.3%         | 196          | 13.7%         | 0.321   |
| Ageusia      | 326          | 18.5%         | 220          | 15.4%         | <0.05   |
| Anosmia      | 357          | 20.3%         | 245          | 17.1%         | <0.05   |
| <b>TOTAL</b> | <b>1,758</b> | <b>100.0%</b> | <b>1,432</b> | <b>100.0%</b> | -       |

**Table S3b).** Typology of COVID-19 like symptoms among symptomatic secondary cases by age group.

|              | <u>&lt; 12 years</u> |               | <u>12-19 years</u> |               | <u>20-39 years</u> |               | <u>40-59 years</u> |               | <u>60-79 years</u> |               | <u>&gt;79 years</u> |               | <b>p-value</b> |
|--------------|----------------------|---------------|--------------------|---------------|--------------------|---------------|--------------------|---------------|--------------------|---------------|---------------------|---------------|----------------|
|              | <b>n</b>             | <b>%</b>      | <b>n</b>           | <b>%</b>      | <b>n</b>           | <b>%</b>      | <b>n</b>           | <b>%</b>      | <b>n</b>           | <b>%</b>      | <b>n</b>            | <b>%</b>      |                |
| Fever        | 124                  | 36.4%         | 81                 | 27.7%         | 285                | 25.9%         | 241                | 25.4%         | 124                | 29.2%         | 19                  | 22.6%         | <0.05          |
| Cough        | 46                   | 13.5%         | 51                 | 17.5%         | 271                | 24.6%         | 252                | 26.6%         | 131                | 30.9%         | 26                  | 31.0%         | <0.05          |
| Odynophagia  | 33                   | 9.7%          | 56                 | 19.2%         | 251                | 22.8%         | 183                | 19.3%         | 56                 | 13.2%         | 9                   | 10.7%         | <0.05          |
| Chill        | 20                   | 5.9%          | 21                 | 7.2%          | 158                | 14.4%         | 110                | 11.6%         | 43                 | 10.1%         | 8                   | 9.5%          | <0.05          |
| Dyspnea      | 6                    | 1.8%          | 10                 | 3.4%          | 94                 | 8.5%          | 68                 | 7.2%          | 24                 | 5.7%          | 9                   | 10.7%         | <0.05          |
| Vomit        | 17                   | 5.0%          | 5                  | 1.7%          | 45                 | 4.1%          | 25                 | 2.6%          | 16                 | 3.8%          | 2                   | 2.4%          | 0.087          |
| Diarrhea     | 40                   | 11.7%         | 30                 | 10.3%         | 156                | 14.2%         | 138                | 14.5%         | 74                 | 17.5%         | 10                  | 11.9%         | <0.05          |
| Ageusia      | 16                   | 4.7%          | 42                 | 14.4%         | 263                | 23.9%         | 160                | 16.9%         | 61                 | 14.4%         | 4                   | 4.8%          | <0.05          |
| Anosmia      | 17                   | 5.0%          | 47                 | 16.1%         | 296                | 26.9%         | 183                | 19.3%         | 57                 | 13.4%         | 2                   | 2.4%          | <0.05          |
| <b>TOTAL</b> | <b>341</b>           | <b>100.0%</b> | <b>292</b>         | <b>100.0%</b> | <b>1100</b>        | <b>100.0%</b> | <b>949</b>         | <b>100.0%</b> | <b>424</b>         | <b>100.0%</b> | <b>84</b>           | <b>100.0%</b> | -              |

**Figure S1.** Forest plot symptom development by pre and post universal PCR period.

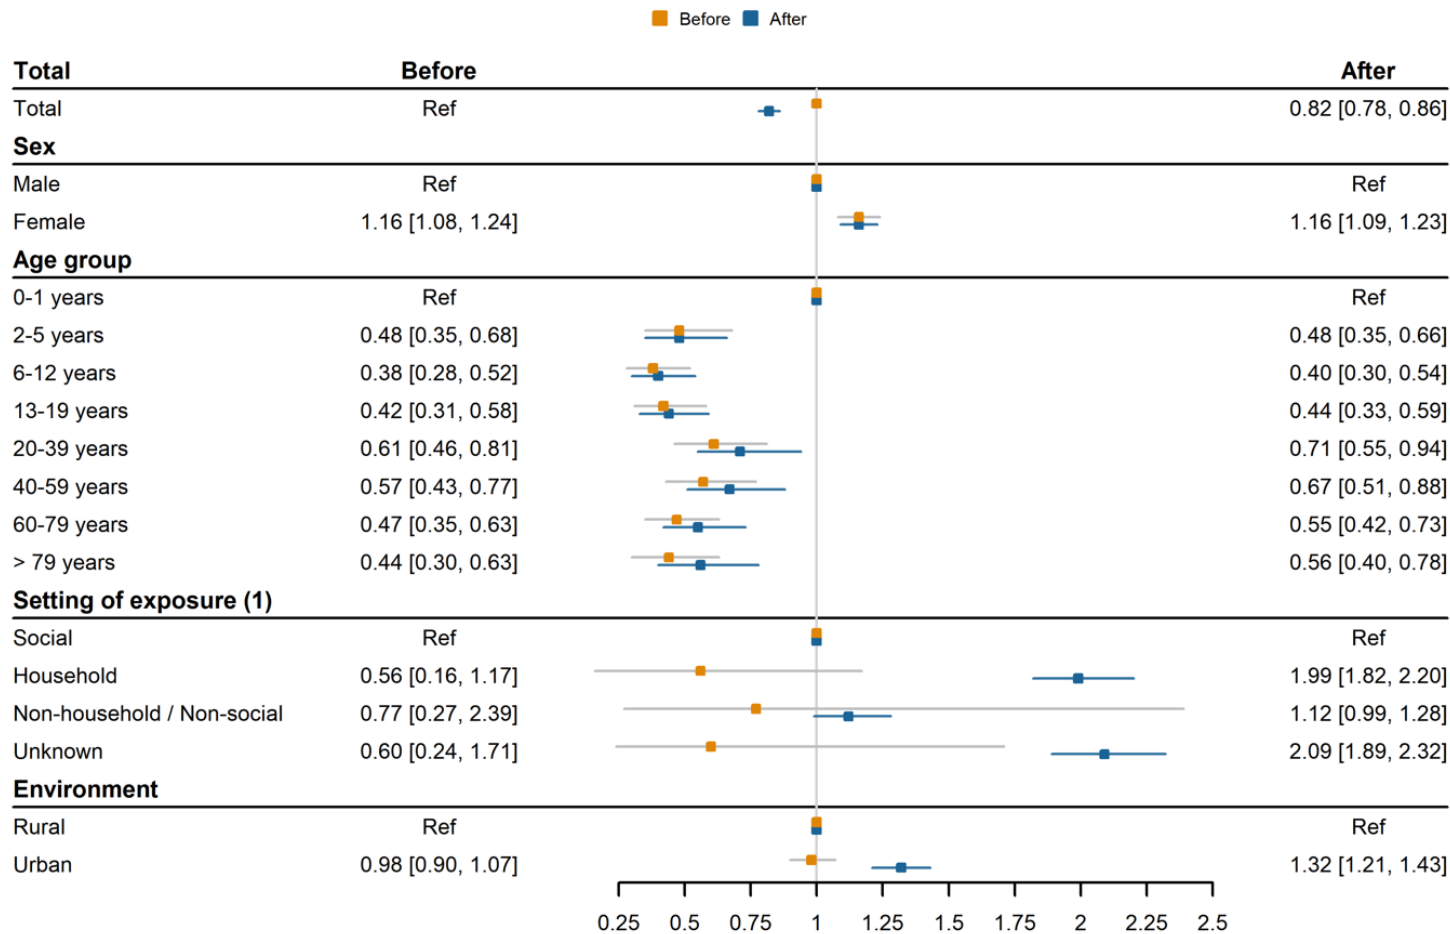

**Figure S2. Forest plot secondary case by pre and post universal PCR period.**

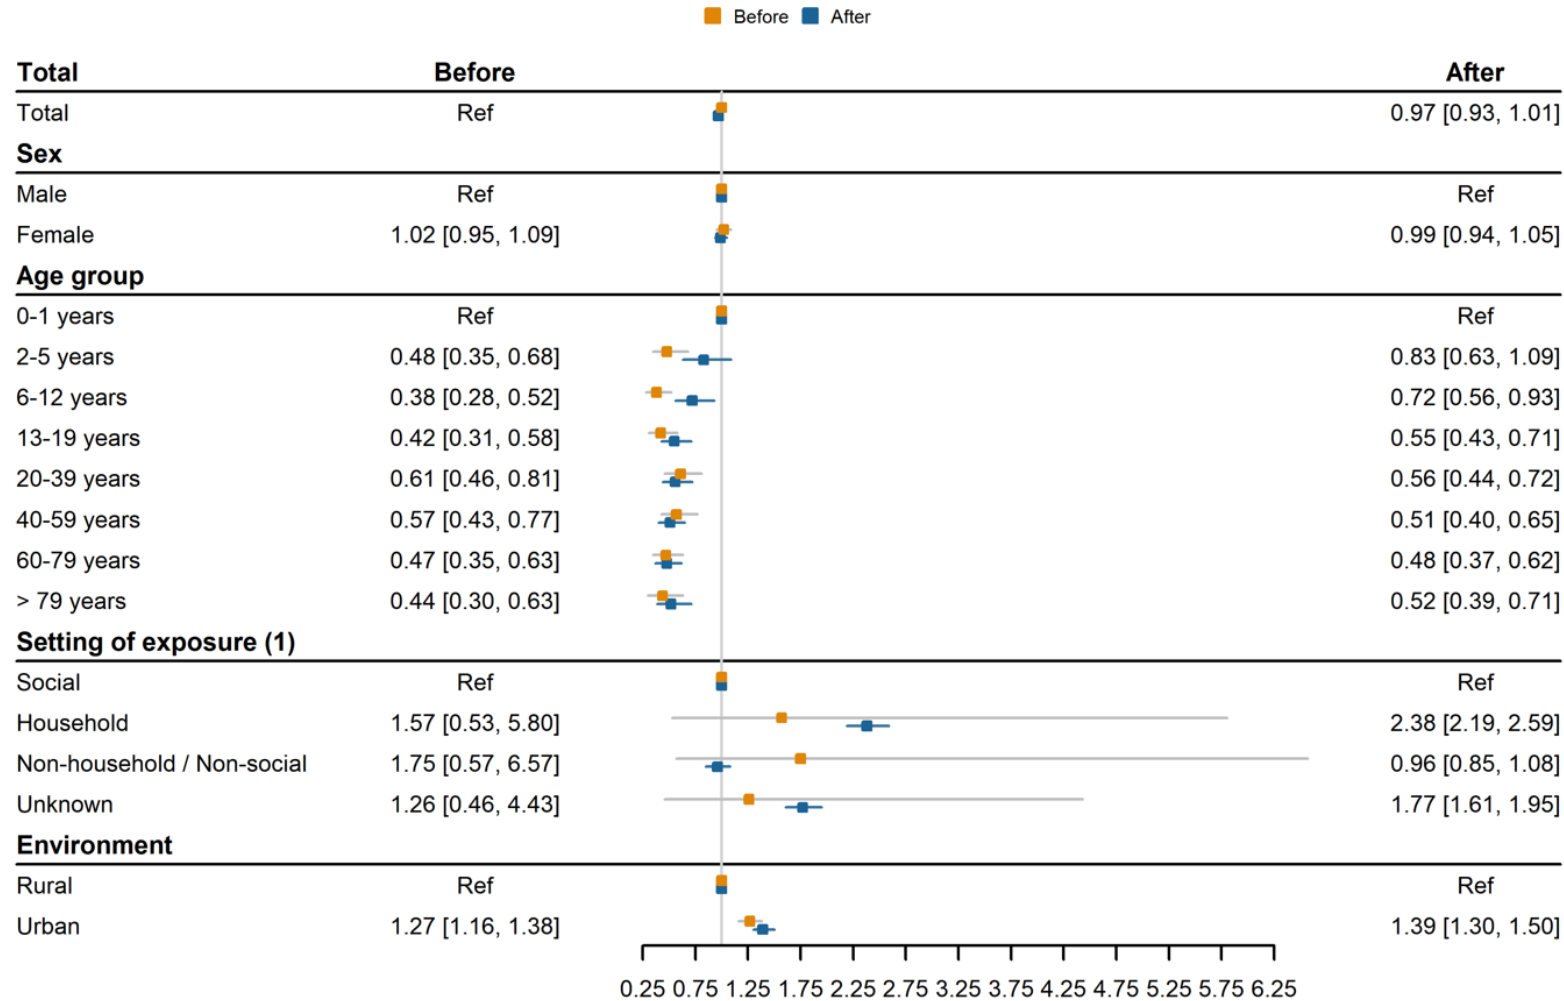

Supplement: s1 [file s1]
